# Supplementary material
Source: PubMed Central journal article supplement (PMC2483375)
Supplement: tpc.108.058891_1.pdf [file tpc.108.058891_1.pdf]

Supplemental Data. Zhang et al. (2008). *Arabidopsis* DDB1-CUL4 ASSOCIATED FACTOR 1 Forms a Nuclear E3 Ubiquitin Ligase with DDB1 and CUL4 that is Involved in Multiple Plant Developmental Processes.

H.sapiens : **VT**-----**TVVHVDSKAELE**-----  
M.musculus : **VT**-----**TVVHVDSKAELE**-----  
C.elegans : **TS**-----**KEIYPLRSTGMMISDODLKLSQMLRIA**-----  
D.melanogaster : **SEGSGSENAEAEEAEEAATAALMAEAVAAYQSDDEEPEADMPQAGDNQEDAAEQDGGEPFEADEDADADDAMSVENAENESDSGGNAEETA**  
O.sativa : **MAAAAAAAPPAPAE**-----**D**-----  
A.thaliana : **DGQEHAEVPE**-----**N-SMVEDQSVAAEAIAELANSIGEPNPEEGEEQ**-----

H.sapiens : **LEQWEKEHG-SGDMVPLTRMSQLEKETEERKGPDPFFDDRPGRDPECMICGELRLITPKDPEFNALVNAV**-----  
M.musculus : **LEQWEKDHG-SGDMVPLTRMSQLEKETEERKGPDPFFDDRPGRDPECMICGELRLITPKDPEFNALVNAV**-----  
C.elegans : **ELLEFDANHEQSSFDPIKRLKRSLELQATDITIKNPPLDDRPHRTHEDSALGRLITPKDPEFNALVNAV**-----  
D.melanogaster : **AADDRQATKRELTOIDRWEOQQTQNGYDPPPLRSLAEPLREKDVRRKRPPLDSRYPYRDSQCYCQRLRFRDRDFHGRKLNDFYRENYFSRON**  
O.sativa : **EALLTRQITILRVVELEONPGLHTPLAFAHAAEAQCA--SPSYINWNRSHITG--LNAAREDFEELFCPLSS**-----  
A.thaliana : **S-----VEDELIKAQKLMEDITSVANNPNPLHASELLESGESLEEEG-----FNSNRGSHNSGACLTREDEPEELSS'PSS**-----

H.sapiens : **NTSRREPLNTAAQRLLDIMPGLTE--AVVQ--EKKEGLVENFKAR**-----**EADTPRNVSTGLIGCENODIAAN--VYDE**  
M.musculus : **NTSRREPLNTAAQRLLDIMPGLTE--AVVQ--EKKEGLVENFKAR**-----**EADTPRNVSTGLIGCENODIAAN--VYDE**  
C.elegans : **LARDNVDLNIQSSSLACTPGLDLS--KWS--EPDDEPRVYAGSE**-----**GNLPHQAGLDAEAENTENASK--TRRE**  
D.melanogaster : **WSRSSLELNIACRITLIMPGET--SAVQTAEGDGTNRVYSAE**-----**DSLPHQAGLDAEAENTENASK--TRRE**  
O.sativa : **DNSYSAAVRSAAARLLSCYSAWTPQYHAE**-----**DAIVENKKVVDTEGGASNECESKHLGKNNKPTDADMRVATGLLMLCGGQQLVEDVLTMGV**  
A.thaliana : **ENSYSTVAKASARLLNCSLTM--YPHD--DAVTENFNKVMVEEAVKFPGEDS--AKKEASDFMLKRVSTGLLGLSRTASRQIYEDVLTMSGL**

H.sapiens : **NSQLVATLRRRELOLQEVLR**-----**QENKRPSPRKSSEPLLPDDEAVD**-----**MDYDMAVD**-----  
M.musculus : **NSQLVATLRRRELOLQEVLR**-----**QDSKRPSPRKSSEPLLPDDEAVD**-----**MDYDMAVD**-----  
C.elegans : **NALLVFPGLRRHELOGRSLEEQ**-----**KKIGQDFSQLHAE**-----**QSTSG--TSIPSKIT**-----  
D.melanogaster : **NIRLVPKLRRHMLLAISKSAT**-----**SDVN--TSMHNSAD**-----  
O.sativa : **SARLVHVRVHGQVACAKQDNPPLDTKHP--RSRDENRSKRLVODSSRDLGMRSGDGLSIDPTSENCNVGMRHAGERWIDDAASLQPERADSSL**  
A.thaliana : **SARLVHVRVHGQVACAKQDNPPLDTKHP--RSRDENRSKRLVODSSRDLGMRSGDGLSIDPTSENCNVGMRHAGERWIDDAASLQPERADSSL**-----**GFETI**

H.sapiens : **VVQ**-----**QDOEE**-----**AS**-----  
M.musculus : **VVQ**-----**QDOEE**-----**SS**-----  
C.elegans : **SVL**-----**Q**-----**ST**-----  
D.melanogaster : **SSV**-----**AG**-----  
O.sativa : **DLFDAMEAGATNRTYSASICDCTKSRVGERLSALRP--RDEEMENRTDRLKRLSRTGSLRGSKAGESLPESERTPLSPTGLKIGTFRREKNMVI**  
A.thaliana : **DGRDVFVNSGVV**-----**CKIKPDDN**-----**SVRDDPSRHLNRSKS--RGRVHEGAPTEVLLASP--RLGRLVDRDLSKI**

H.sapiens : **CDMEISPHLDSGHKTSRVNSTRKPKEDGLKKNKSAQGRDENRKAQK--LGFSSSDP**  
M.musculus : **RDMEISPHLDSGHKTSRVNSTRKPKEDGLKKNKSAQGRDENRKAQK--LGFSSSDP**  
C.elegans : **KENKTFVQSTDPKPKR--RTEPCLTSLRTEITR--VPSHNLRN**  
D.melanogaster : **MLSVWACASNASAPQS--PQHNGSLGASSSQHGDANMSLFE**  
O.sativa : **EDANKADVWNSPGLIEP--FNAISKEEYEDRFKDCIIGLKDIDSVLKVAAEAARSANAPDEAVKAAGDAAALVKSAAEVTGKNGNDAAVLAEEK**  
A.thaliana : **SDGRNAEDVTVCLGRMKSIMETIREDNDECFOGCIITGKNIIDVVKRAVGAATEARAHAHPDAAKAAGDAAALVKSAAEVTGKNGNDAAVLAEEK**

H.sapiens : **DRMVELSNSSWSEMP**-----**WIGTNYLYPMTPAIEPLIYVYVPIGEVQDLPFIFMGLGSRMMFYDLKQTN**-----**VL**  
M.musculus : **DRMVELSNSSWSEMP**-----**WIGTNYLYPMTPAIEPLIYVYVPIGEVQDLPFIFMGLGSRMMFYDLKQTN**-----**VL**  
C.elegans : **DDSNKWDILOP**-----**PIGD--QOYPLSLATYRPLIYVYVPIGEVQDLPFIFMGLGSRMMFYDLKQTN**-----**VR**  
D.melanogaster : **NSRDAFVSR**-----**FYKRMYPLEHAAADTSMLLRRTLSGEVQDLPFIFMGLGSRMMFYDLKQTN**-----**TC**  
O.sativa : **AAATVDAAMSTVSRSNQVGEHVVVEEVPQISEDDFVTDHQLLOEYVYVYVPIGEVQDLPFIFMGLGSRMMFYDLKQTN**  
A.thaliana : **AAITVDAAE--VSRN**-----**PTCVTSQDTPDSEVSLPDIESLAQLQVYVYVPIGEVQDLPFIFMGLGSRMMFYDLKQTN**

H.sapiens : **TEFALRFAASLLKPKFAEVAHGVORLSDIPRSMANVSGMGLYVSYNDAMERVGMHPHNEDVWNYTMMKESHA--GCCN--MFFSICISF**  
M.musculus : **TEFALRFAASLLKPKFAEVAHGVORLSDIPRSMANVSGMGLYVSYNDAMERVGMHPHNEDVWNYTMMKESHA--GCCN--MFFSICISF**  
C.elegans : **TEFALRFAASLLKPKFAEVAHGVORLSDIPRSMANVSGMGLYVSYNDAMERVGMHPHNEDVWNYTMMKESHA--GCCN--MFFSICISF**  
D.melanogaster : **FAEVLVFAASLLKPKFAEVAHGVORLSDIPRSMANVSGMGLYVSYNDAMERVGMHPHNEDVWNYTMMKESHA--GCCN--MFFSICISF**  
O.sativa : **FLFDVLRICAAARPKFAEVAHGVORLSDIPRSMANVSGMGLYVSYNDAMERVGMHPHNEDVWNYTMMKESHA--GCCN--MFFSICISF**  
A.thaliana : **FLFDVLRICAAARPKFAEVAHGVORLSDIPRSMANVSGMGLYVSYNDAMERVGMHPHNEDVWNYTMMKESHA--GCCN--MFFSICISF**

H.sapiens : **RVLELDFRYDGRRLVNIISTLEHNL**-----**DOGALLSDEIFASRGTGKTCMAERKFEAHAIKEDVQSLORTEGG**-----**ILV**  
M.musculus : **RVLELDFRYDGRRLVNIISTLEHNL**-----**DOGALLSDEIFASRGTGKTCMAERKFEAHAIKEDVQSLORTEGG**-----**ILV**  
C.elegans : **RVLELDFRYDGRRLVNIISTLEHNL**-----**DOGALLSDEIFASRGTGKTCMAERKFEAHAIKEDVQSLORTEGG**-----**ILV**  
D.melanogaster : **RVLELDFRYDGRRLVNIISTLEHNL**-----**DOGALLSDEIFASRGTGKTCMAERKFEAHAIKEDVQSLORTEGG**-----**ILV**  
O.sativa : **RVLELDFRYDGRRLVNIISTLEHNL**-----**DOGALLSDEIFASRGTGKTCMAERKFEAHAIKEDVQSLORTEGG**-----**ILV**  
A.thaliana : **RVLELDFRYDGRRLVNIISTLEHNL**-----**DOGALLSDEIFASRGTGKTCMAERKFEAHAIKEDVQSLORTEGG**-----**ILV**

H.sapiens : **HPOPEYKACSYTHEQVEMFLIEYGP--AQLYBPAEVPKLSVOLHDTISACNWK--TYARNDTVREADDVAILTVKQLQAESVDVLE**  
M.musculus : **HPOPEYKACSYTHEQVEMFLIEYGP--AQLYBPAEVPKLSVOLHDTISACNWK--TYARNDTVREADDVAILTVKQLQAESVDVLE**  
C.elegans : **QDCEYKSMKPYEVCWQCAVTEMLRFTGSS--EAENLRKLGMVRMFAVLSRWDENISPLNTEMCVHAEETLGMFGLSOTETL--QH**  
D.melanogaster : **FNQNTVAKLTTPDLDNDQTLQEHETS--IRAHQVDPVQLKLGITMFAHAFPSYDWV--SGRSETRSLDLSGCTTFRVYVPCR--LL**  
O.sativa : **MLDKTTTSFCFSLVGAAGE--ISSAEVKSAAVAVLCHQVSI--IRKDSGTLKFK**  
A.thaliana : **ATLSNNRACIAVLDANISNSIVPEHTQPAVNLNIVPEPISLNKSSSTGNOQPAATQAGGAFSENDRNAEKTDRNLTAQOESRERCGDGT**

H.sapiens : **PRRKLQNPQKSS**-----**BHTLAKMNVVQSNGLKLLSLSIRK**-----**PLTADQIRALACHALVGLSRSSTVROLIER**  
M.musculus : **PRRKLQNPQKSS**-----**BHTLAKMNVVQSNGLKLLSLSIRK**-----**PLTADQIRALACHALVGLSRSSTVROLIER**  
C.elegans : **EESKSSAKROSKEYI**-----**IMNHLERMWTVRKGDTGIMAVNLNCKR**-----**PLTADQIRALACHALVGLSRSSTVROLIER**  
D.melanogaster : **SSRKNKANHYA**-----**ELLERWVWVCSNGLVLLSLSIRK**-----**PLTADQIRALACHALVGLSRSSTVROLIER**  
O.sativa : **SOQNTVQISTPVPSPGVDRRIISLGVGGGGLAQLQGVYQAREAVRGNCKLGLSRT--FVPLVIRALACHALVGLSRSSTVROLIER**  
A.thaliana : **QSTGNAPQTPVAPASSGLVDRRIISLGVGGGGLAQLQGVYQAREAVRGNCKLGLSRT--FVPLVIRALACHALVGLSRSSTVROLIER**

H.sapiens : **DFSSCCFOOLREPVLE**-----**DKRSDHVFKCYVAELERVSGK--PLLIGTVSLARQAD--VWQSRHSPERELLRNHTSKSGEAT**  
M.musculus : **DFSSCCFOOLREPVLE**-----**DKRSDHVFKCYVAELERVSGK--PLLIGTVSLARQAD--VWQSRHSPERELLRNHTSKSGEAT**  
C.elegans : **DFIANGNOLMREPVCS--DKRDIHAAFCYSNOLLOVYGR--KHPDQCKEYQSESHROWLEWVQNSQLDGLDLSKSDSVA**  
D.melanogaster : **DFFASGQOIMRDEPL--EKRAEHVIRKVMDELERVSGKTK--PLNPLVPSLSNHRAN--VWQSRHSPERELLRNHTSKSGEAT**  
O.sativa : **DFVGG--KKSELRTDTSIGDQNSRWONELTQVAVELIAVLSNGKETTAAATAAPARIRERACAAAEVWHSRSLQDHEHILGSGPTAAEA**  
A.thaliana : **DFVGG--KSELRTDTSIGDQNSRWONELTQVAVELIAVLSNGKETTAAATAAPARIRERACAAAEVWHSRSLQDHEHILGSGPTAAEA**



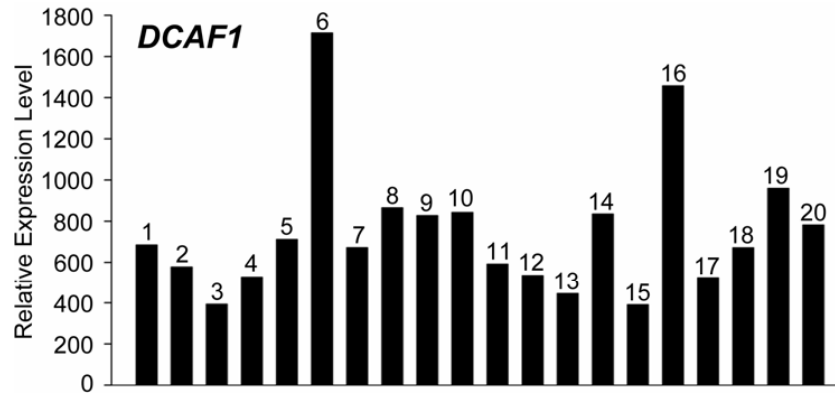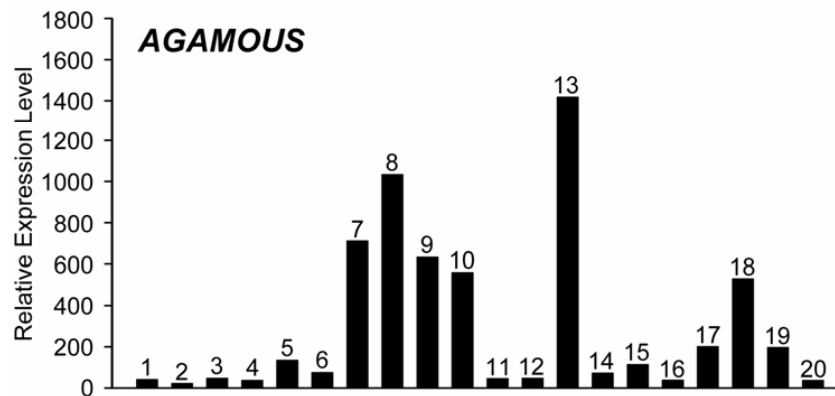

**Supplemental Figure 2.** Expression Profiles of the *DCAF1* Gene from a Prior Published Microarray Analysis.

Expression profiles of the *DCAF1* gene in different *Arabidopsis* organs derived from a genome expression profile study (Ma et al., 2005). The *AGAMOUS* gene is taken as a positive control (Ma et al., 2005). The relative expression levels of individual genes in each organ, shown by the black bars, represent the relative abundance to the *Arabidopsis* suspension cultured cell as a common control. Bar 1, cauline leaf; bar 2, cotyledon in white light; bar 3, rosette leaf; bar 4, cotyledon in dark; bar 5, hypocotyl in dark; bar 6, hypocotyl in white light; bar 7, pistil, one day after pollination; bar 8, pistil, one day before pollination; bar 9, silique, three days after pollination; bar 10, silique, eight days after pollination; bar 11, stem; bar 12, sepal; bar 13, stamen; bar 14, petal; bar 15, root in dark; bar 16, root in white light; bar 17, germinated seed; bar 18, flower; bar 19, inflorescence; bar 20, seedling.

*dcaf1-1/+*

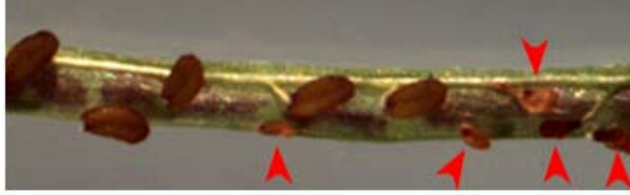

*dcaf1-2/+*

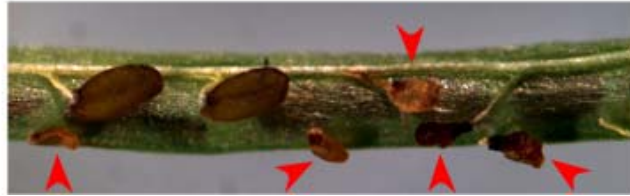

**Supplemental Figure 3.** Matured Siliques from the *dcaf1* Heterozygotes. Stereomicroscopic images of siliques obtained from self-pollinated *dcaf1-1/+* and *dcaf1-2/+* parental plants. Red arrowheads indicate the abnormal shrunk, red seeds.

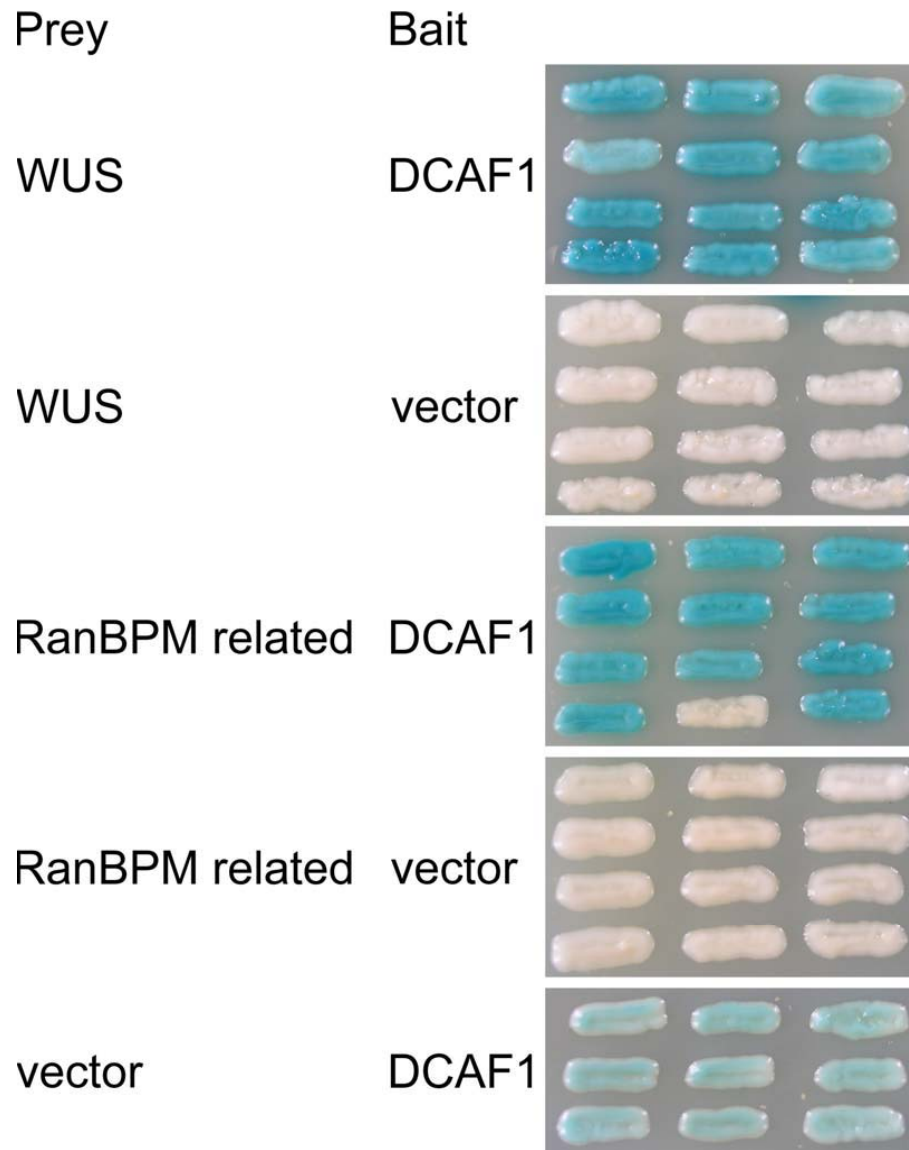

**Supplemental Figure 4.** Interaction Tests between Potential DCAF1 Target Proteins and DCAF1.

Test of potential DCAF1 target proteins using a yeast two-hybrid screen. The interaction results are shown as the development of blue color produced by  $\beta$ -galactosidase activities with X-gal as substrate in the *in vivo* plate assay.

---

**Supplemental Table 1.** Numbers of Putative DCAF Proteins and [WY][DE]x[RK] Motifs in *Arabidopsis* and Rice

---

|                                | <i>Arabidopsis</i> | <b>Rice</b> |
|--------------------------------|--------------------|-------------|
| <b>Protein Number</b>          | 119                | 110         |
| <b>WDxR Motif Total Number</b> | 165                | 151         |
| <b>WDxR</b>                    | 108                | 102         |
| <b>WDxK</b>                    | 22                 | 24          |
| <b>YDxR</b>                    | 24                 | 15          |
| <b>YDxK</b>                    | 6                  | 4           |
| <b>WExR</b>                    | 1                  | 3           |
| <b>WExK</b>                    | 2                  | 3           |
| <b>YExR</b>                    | 1                  | 0           |
| <b>YExK</b>                    | 1                  | 0           |

---



| Supplemental Table 2. <i>Continued</i> |      |      |      |      |      |      |      |      |     |
|----------------------------------------|------|------|------|------|------|------|------|------|-----|
| Gene ID                                | WDxR | WDxK | YDxR | YDxK | WExR | WExK | YExR | YExK | DWD |
| AT3G63460                              | 2    |      |      |      |      |      |      |      |     |
| AT4G01860                              |      | 1    |      |      |      |      |      |      | 1   |
| AT4G02730                              | 1    | 1    |      |      |      | 1    |      |      | 1   |
| AT4G03020                              | 2    |      |      |      |      |      |      |      | 2   |
| AT4G04940                              |      | 1    |      |      |      |      |      |      |     |
| AT4G05410                              | 1    |      |      |      |      |      |      |      | 1   |
| AT4G11110                              |      | 1    | 1    |      |      |      |      |      | 1   |
| AT4G15900                              | 2    | 1    |      |      |      |      |      |      | 2   |
| AT4G21130                              | 1    |      |      |      |      |      |      |      | 1   |
| AT4G21520                              | 1    |      |      |      |      |      |      |      |     |
| AT4G28450                              |      |      | 1    |      |      |      |      |      | 1   |
| AT4G29380                              | 3    |      |      |      |      |      |      |      | 1   |
| AT4G29730                              | 1    |      |      |      |      |      |      |      | 1   |
| AT4G29830                              |      | 1    |      |      |      |      |      |      | 1   |
| AT4G29860                              | 1    |      |      |      |      |      |      |      | 1   |
| AT4G31160                              | 2    |      |      |      |      |      |      |      |     |
| AT4G34280                              | 1    |      |      |      |      |      |      |      | 1   |
| AT4G34460                              | 1    |      | 1    |      |      |      |      |      | 2   |
| AT4G35050                              | 1    |      |      |      |      |      |      |      | 1   |
| AT4G35560                              |      | 1    |      |      |      |      |      |      |     |
| AT4G38480                              |      |      | 1    |      |      |      |      |      |     |
| AT5G01770                              |      |      | 1    |      |      |      |      |      | 1   |
| AT5G05970                              |      |      | 1    |      |      |      |      |      |     |
| AT5G07590                              | 1    |      |      |      |      |      |      |      |     |
| AT5G08390                              | 1    |      |      |      |      |      |      |      | 1   |
| AT5G10940                              |      |      | 1    |      |      |      |      |      | 1   |
| AT5G12920                              | 2    |      |      |      |      |      |      |      | 1   |
| AT5G13480                              | 1    |      | 1    |      |      |      |      |      | 2   |
| AT5G14050                              | 1    |      |      |      |      |      |      |      | 1   |
| AT5G14530                              | 1    |      |      |      |      |      |      |      | 1   |
| AT5G15550                              | 2    |      |      |      |      |      |      |      | 2   |
| AT5G17370                              |      |      | 1    |      |      |      |      |      |     |
| AT5G18525                              | 1    |      |      |      |      |      |      |      | 1   |
| AT5G19920                              |      |      | 1    |      |      |      |      |      |     |
| AT5G23430                              | 1    |      |      |      |      |      |      |      | 1   |
| AT5G23730                              | 1    |      | 2    |      |      |      |      |      | 1   |
| AT5G27080                              | 1    |      |      |      |      |      |      |      |     |
| AT5G27570                              | 1    |      |      |      |      |      |      |      | 1   |
| AT5G49430                              | 1    |      |      |      |      |      |      |      | 1   |
| AT5G52250                              | 1    |      | 2    |      |      |      |      |      | 1   |
| AT5G52820                              |      |      |      |      | 1    |      |      |      | 1   |
| AT5G54520                              | 1    |      |      | 1    |      |      |      |      | 1   |
| AT5G56130                              | 1    |      |      |      |      |      |      |      | 1   |
| AT5G56190                              | 1    |      |      | 1    |      |      |      |      | 1   |
| AT5G58230                              | 1    |      |      |      |      |      |      |      | 1   |
| AT5G58760                              | 1    |      |      |      |      |      |      |      | 1   |
| AT5G60940                              | 1    |      |      |      |      |      |      |      |     |
| AT5G63010                              | 2    |      |      |      |      |      |      |      | 2   |
| AT5G64730                              | 1    |      |      |      |      |      |      |      | 1   |
| AT5G66240                              | 1    |      |      |      |      |      |      |      | 1   |
| AT5G67320                              |      | 1    |      |      |      |      |      |      | 1   |



| Supplemental Table 3. Putative DCAF Proteins in Rice and the Numbers of [WY][DE][RK] or DWD Motifs in Each Protein. |      |      |      |      |      |      |      |      |     |
|---------------------------------------------------------------------------------------------------------------------|------|------|------|------|------|------|------|------|-----|
| Gene ID                                                                                                             | WDxR | WDxK | YDxR | YDxK | WExR | WExK | YExR | YExK | DWD |
| Os01g03510                                                                                                          |      |      |      | 2    |      |      |      |      | 1   |
| Os01g04870                                                                                                          | 1    |      |      |      |      |      |      |      | 1   |
| Os01g08770                                                                                                          | 1    |      |      |      |      |      |      |      | 1   |
| Os01g09020                                                                                                          | 1    |      |      |      |      |      |      |      |     |
| Os01g09252                                                                                                          |      | 1    |      |      |      |      |      |      | 1   |
| Os01g13730                                                                                                          |      |      | 1    |      |      |      |      |      | 1   |
| Os01g21940                                                                                                          |      | 1    |      |      |      |      |      |      | 1   |
| Os01g28680                                                                                                          | 2    |      |      |      |      |      |      |      | 2   |
| Os01g37120                                                                                                          |      | 1    |      |      |      |      |      |      | 1   |
| Os01g39380                                                                                                          | 2    |      |      |      |      |      |      |      | 2   |
| Os01g42260                                                                                                          | 1    |      |      |      |      |      |      |      |     |
| Os01g42270                                                                                                          | 1    |      |      |      |      |      |      |      |     |
| Os01g44394                                                                                                          | 1    |      |      |      |      |      |      |      | 1   |
| Os01g51300                                                                                                          | 2    |      |      |      |      |      |      |      | 2   |
| Os01g52640                                                                                                          |      |      | 1    |      |      |      |      |      | 1   |
| Os01g57210                                                                                                          |      | 1    |      |      |      |      |      |      | 1   |
| Os01g72220                                                                                                          |      | 1    | 1    |      |      |      |      |      | 2   |
| Os01g85800                                                                                                          | 1    |      |      |      |      |      |      |      |     |
| Os01g86720                                                                                                          | 1    |      | 1    |      |      |      |      |      |     |
| Os02g02380                                                                                                          | 1    |      | 1    |      |      |      |      |      | 1   |
| Os02g11060                                                                                                          | 1    |      |      |      |      |      |      |      |     |
| Os02g14790                                                                                                          | 3    |      |      |      |      |      |      |      | 2   |
| Os02g18820                                                                                                          |      | 1    |      |      |      |      |      |      | 1   |
| Os02g20430                                                                                                          | 1    |      |      |      |      |      |      |      | 1   |
| Os02g21490                                                                                                          | 1    |      |      | 1    |      |      |      |      | 1   |
| Os02g37856                                                                                                          | 2    |      |      |      |      |      |      |      | 2   |
| Os02g48964                                                                                                          | 1    |      |      |      |      |      |      |      |     |
| Os02g49090                                                                                                          | 1    |      |      |      |      |      |      |      | 1   |
| Os02g53140                                                                                                          |      | 1    |      |      |      |      |      |      | 1   |
| Os02g55340                                                                                                          | 3    |      |      |      |      |      |      |      | 1   |
| Os02g61760                                                                                                          | 1    |      |      |      |      |      |      |      |     |
| Os03g02440                                                                                                          | 1    |      |      |      |      |      |      |      | 1   |
| Os03g08830                                                                                                          |      |      | 1    |      | 1    |      |      |      | 1   |
| Os03g17780                                                                                                          |      |      | 1    |      |      |      |      |      |     |
| Os03g21990                                                                                                          | 1    | 1    |      |      |      |      |      |      | 1   |
| Os03g23909                                                                                                          | 2    |      |      |      |      |      |      |      | 2   |
| Os03g26870                                                                                                          | 1    |      |      |      |      |      |      |      | 1   |
| Os03g27970                                                                                                          |      | 2    |      |      |      |      |      |      | 1   |
| Os03g33580                                                                                                          | 1    |      | 1    |      |      |      |      |      | 1   |
| Os03g42770                                                                                                          | 1    |      |      |      |      |      |      |      | 1   |
| Os03g43890                                                                                                          | 1    | 1    |      |      |      |      |      |      | 2   |
| Os03g46650                                                                                                          | 1    |      |      |      |      |      |      |      | 1   |
| Os03g47780                                                                                                          | 1    |      |      |      |      | 1    |      |      | 1   |
| Os03g48090                                                                                                          | 1    |      |      |      |      |      |      |      | 1   |
| Os03g49200                                                                                                          | 2    |      | 1    |      |      |      |      |      | 1   |
| Os03g50340                                                                                                          | 1    |      |      |      |      |      |      |      |     |
| Os03g50350                                                                                                          | 1    |      |      |      |      |      |      |      |     |
| Os03g51550                                                                                                          |      |      |      |      | 1    |      |      |      | 1   |
| Os03g52470                                                                                                          | 1    |      |      |      |      |      |      |      |     |
| Os03g53510                                                                                                          | 1    |      |      |      |      |      |      |      | 1   |
| Os03g73800                                                                                                          | 1    |      |      |      |      |      |      |      |     |
| Os04g42880                                                                                                          | 2    |      |      |      |      |      |      |      | 2   |
| Os04g50660                                                                                                          | 1    |      |      |      |      |      |      |      | 1   |
| Os04g52870                                                                                                          | 1    |      |      |      |      |      |      |      |     |
| Os04g58130                                                                                                          | 1    |      |      |      |      |      |      |      | 1   |
| Os04g69120                                                                                                          | 2    |      |      |      |      |      |      |      |     |
| Os05g05210                                                                                                          | 2    |      | 1    |      |      |      |      |      | 3   |
| Os05g16660                                                                                                          | 1    |      |      |      |      |      |      |      | 1   |
| Os05g33710                                                                                                          | 2    |      |      |      |      |      |      |      | 2   |
| Os05g36350                                                                                                          |      | 1    |      |      |      |      |      |      |     |
| Os05g46570                                                                                                          | 1    |      |      |      |      |      |      |      | 1   |
| Os05g49590                                                                                                          |      |      | 1    |      |      |      |      |      | 1   |
| Os06g04040                                                                                                          | 1    |      |      |      |      |      |      |      |     |
| Os06g07540                                                                                                          | 1    |      |      |      |      |      |      |      | 1   |
| Os06g12840                                                                                                          |      |      | 1    |      |      |      |      |      |     |



## Supplemental Methods

### Microarray Analysis

The expression profiles of the *DCAF1* and *AGAMOUS* genes in *Arabidopsis* were extracted from a recent whole-genome expression profiling study using a 70-mer oligonucleotide microarray (Ma et al., 2005). Details of the materials and methods can be found in the original publication. The 70-mer sequences whose expression data are reported in this article are as follows: DCAF1, 5'-

AAACATCGAGGACGTTATGTCAGCGGTTACACACGCCGTGTGAAACATCC  
CTTGTTTGCTGCTTTCCGC-3'; AGAMOUS, 5'-

AACAGTGTAAGGACTATTGAGAGGTACAAGAAGGCAATATCGGACAA  
TTCTAACACCGGATCGGTGG-3'. The 12 distinct negative control oligos, with no

match in the genome sequence, were printed 16 times at well-spaced location on each slide to avoid potential errors caused by the spatial effects. Except for petal (two replicates) and pistil one day after pollination (four replicates), there were three biological replicates used for all organ types, with one quality data set from each replicate. The *Arabidopsis* suspension cultured cells were included as a common control to estimate the relative expression for each transcript in different organs. The relative abundance of individual genes was referred as the relative expression level in each organ.
